# Supplementary material for: Hyunganol II Exerts Antiadipogenic Properties via MAPK-Mediated Suppression of PPARγ Expression in Human Bone Marrow-Derived Mesenchymal Stromal Cells
Source: Hindawi journal article supplement (doi:10.1155/2022/4252917), 2022-10-17

Figure 3A - PPAR $\gamma$

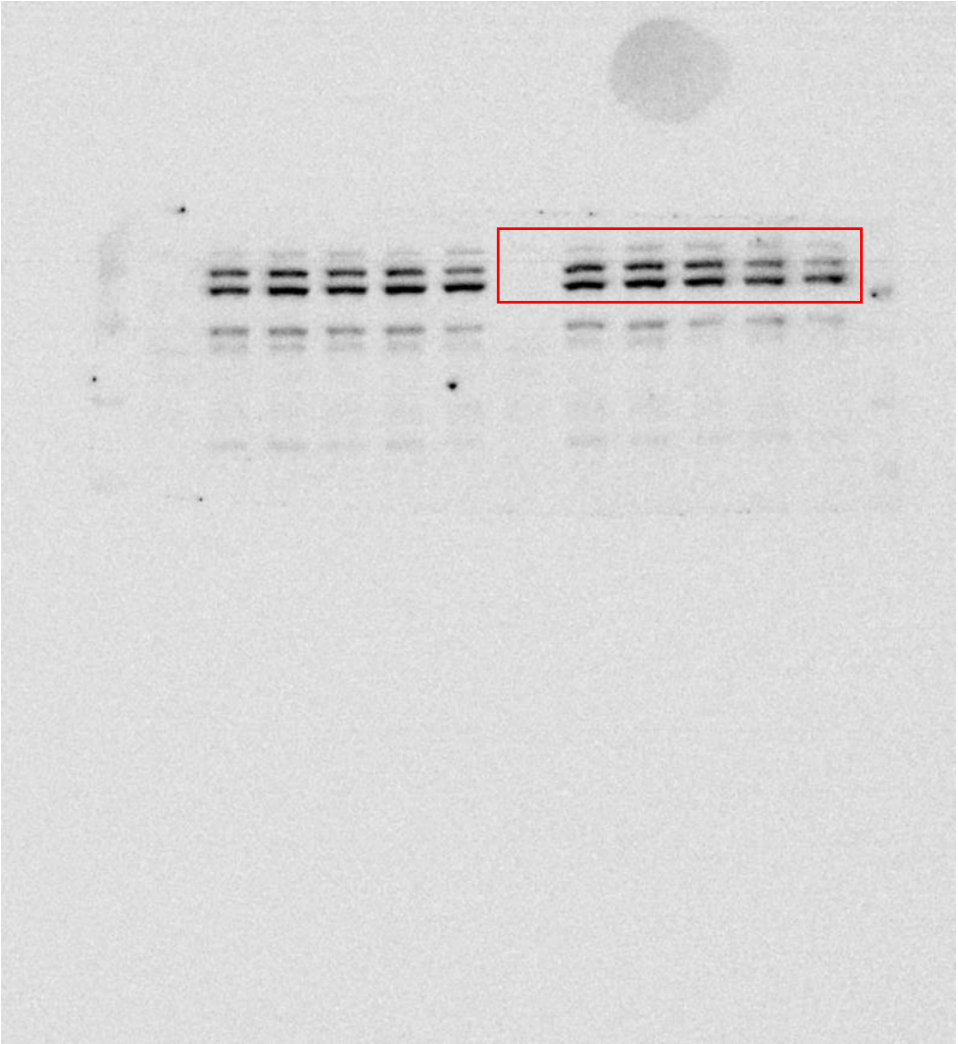

Figure 3A - C/EBP $\alpha$

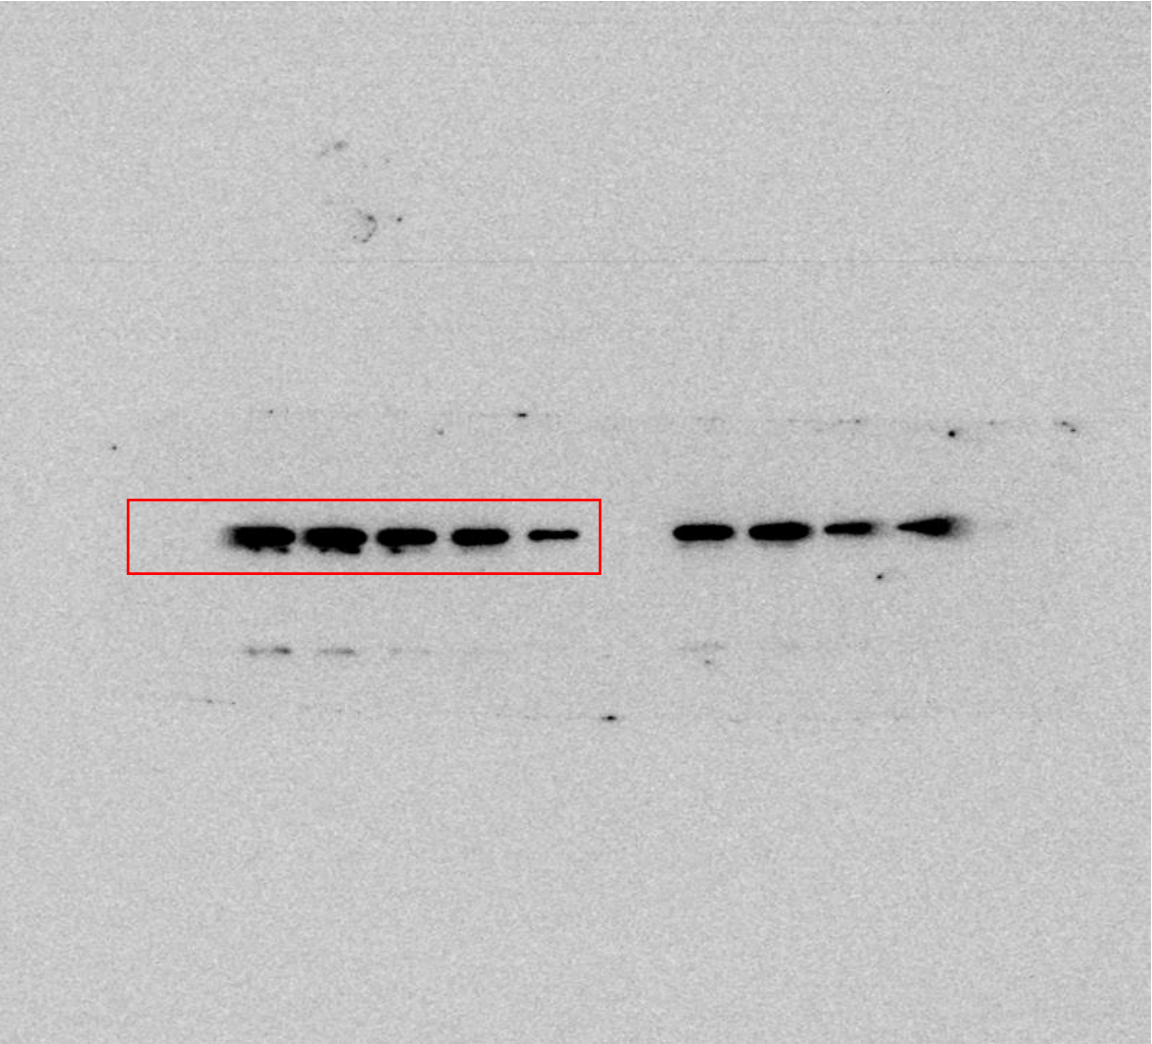

Figure 3A – SREBP1c

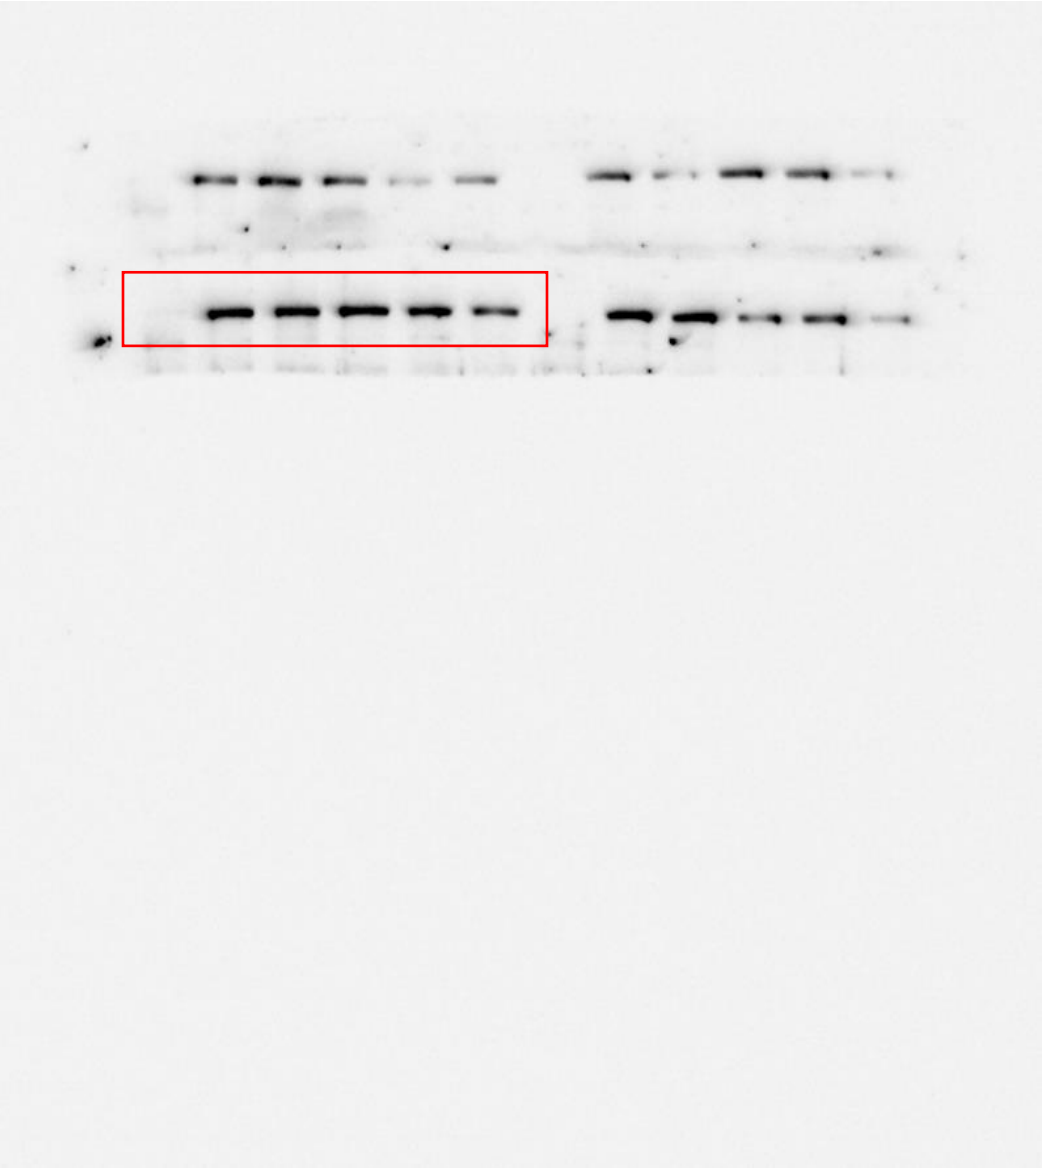

Figure 3A –  $\beta$ -actin

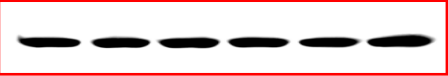

Figure 3B – PPAR $\gamma$

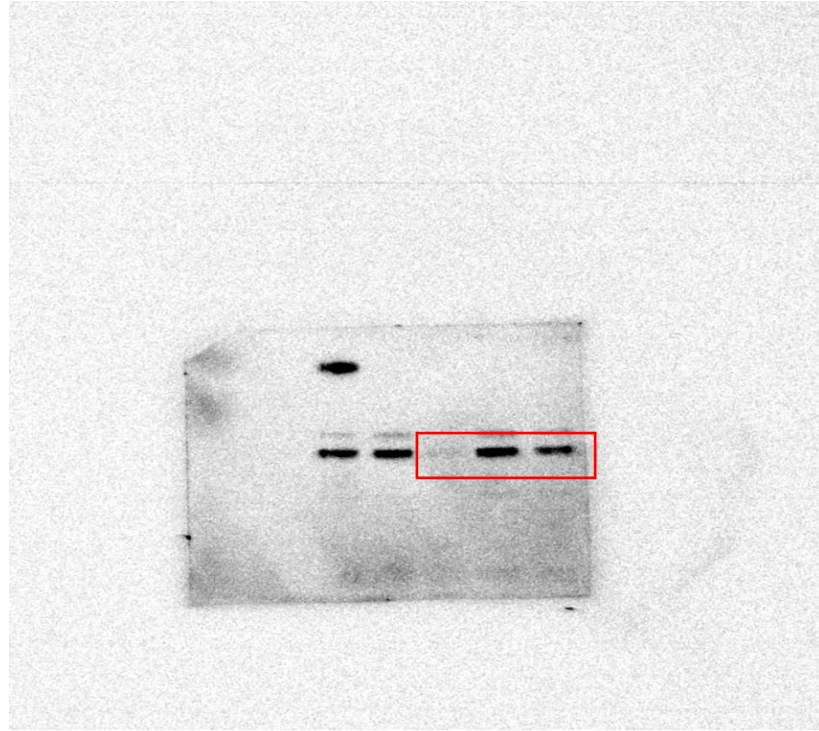

Figure 3B – lamin B1

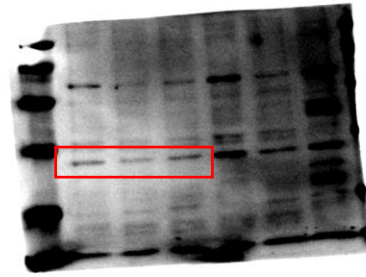

Figure 4 – p-p38

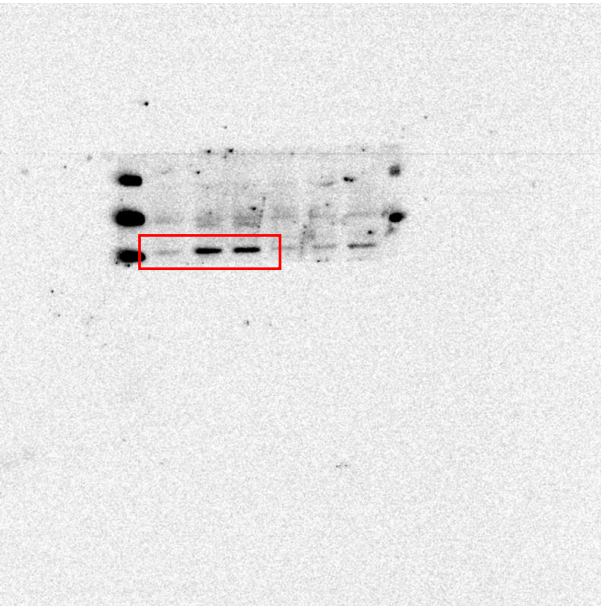

Figure 4 – p-ERK

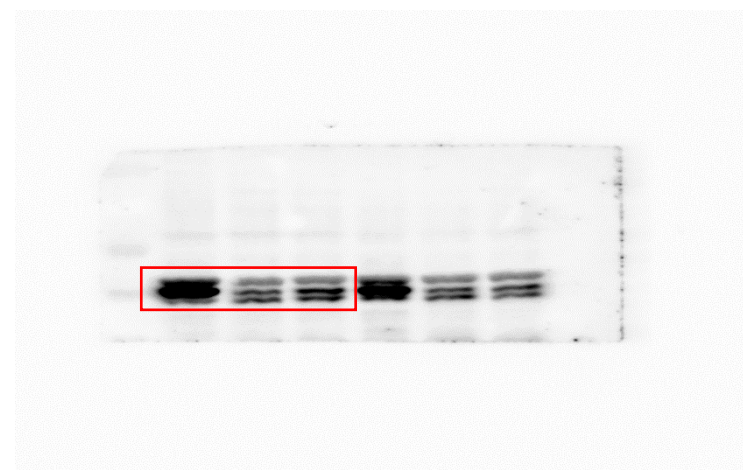

Figure 4 – p-JNK

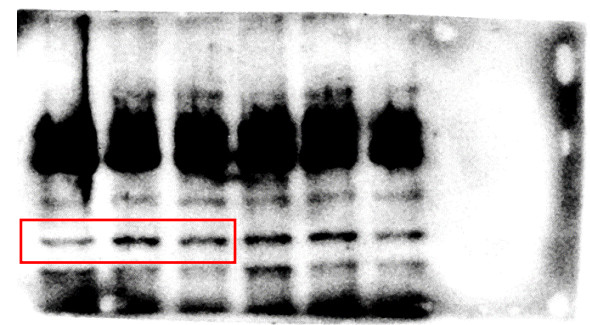

Figure 4 – p38

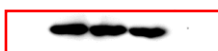

Figure 4 – ERK

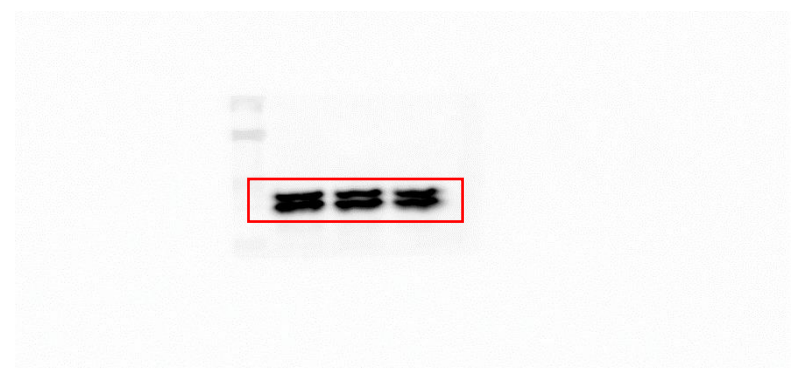

Figure 4 – JNK

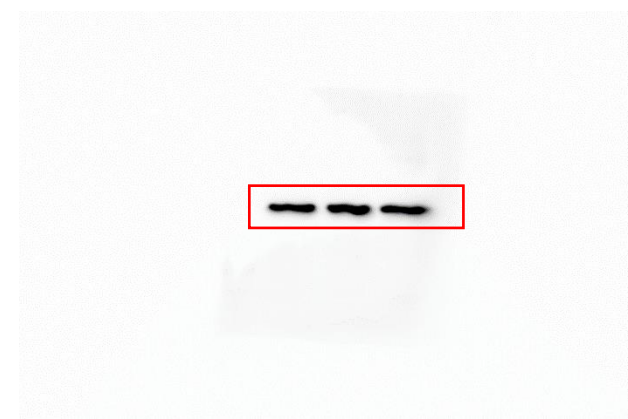

Figure 4 –  $\beta$ -actin

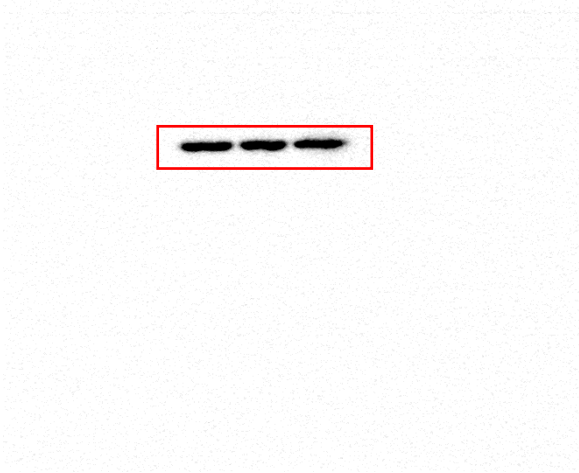

Figure 4 – p-cFos

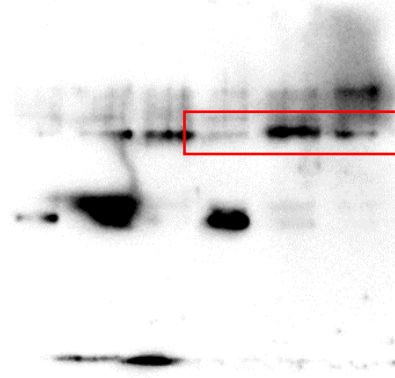

Figure 4 – p-cJun

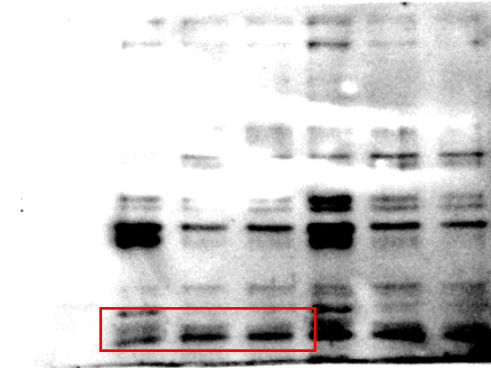

Figure 4 – lamin B1

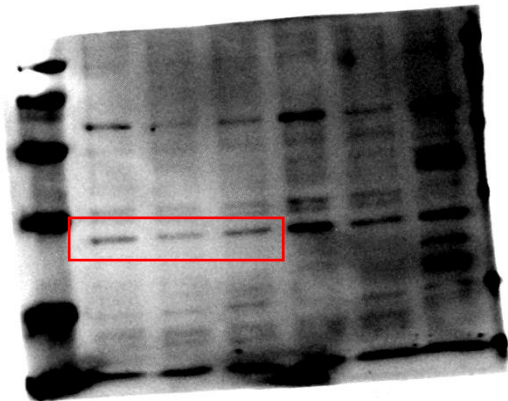

Supplement: f1 [file 4252917.f1.pdf]
